# Supplementary material for: Enhanced Proliferative and Osteogenic Potential of Periodontal Ligament Stromal Cells
Source: MDPI journal article supplement (doi:10.3390/biomedicines11051352), 2023-05-03
Supplement: s1 [file s1]

# Supplementary information

## Enhanced Proliferative and Osteogenic Potential of Periodontal Ligament Stromal Cells

Laura Alves <sup>1,2</sup>, Vanessa Machado <sup>3,4</sup>, João Botelho <sup>3,4</sup>, José João Mendes <sup>3,4</sup>, Joaquim M.S. Cabral <sup>1,2</sup>, Cláudia L. da Silva <sup>1,2</sup> and Marta S. Carvalho <sup>1,2,\*</sup>

<sup>1</sup> Department of Bioengineering and iBB, Institute for Bioengineering and Biosciences, Instituto Superior Técnico, Universidade de Lisboa, Av. Rovisco Pais, 1049-001 Lisboa, Portugal

<sup>2</sup> Associate Laboratory i4HB – Institute for Health and Bioeconomy at Instituto Superior Técnico, Universidade de Lisboa, Av. Rovisco Pais, 1049-001 Lisboa, Portugal

<sup>3</sup> Clinical Research Unit, Egas Moniz Center for Interdisciplinary Research, Egas Moniz School of Health and Science, Almada 2829-511, Portugal.

<sup>4</sup> Evidence-Based Hub, Egas Moniz Center for Interdisciplinary Research, Egas Moniz School of Health and Science, Almada 2829-511, Portugal.

\* Correspondence: [martacarvalho@tecnico.ulisboa.pt](mailto:martacarvalho@tecnico.ulisboa.pt)

## Supplementary Figure S1

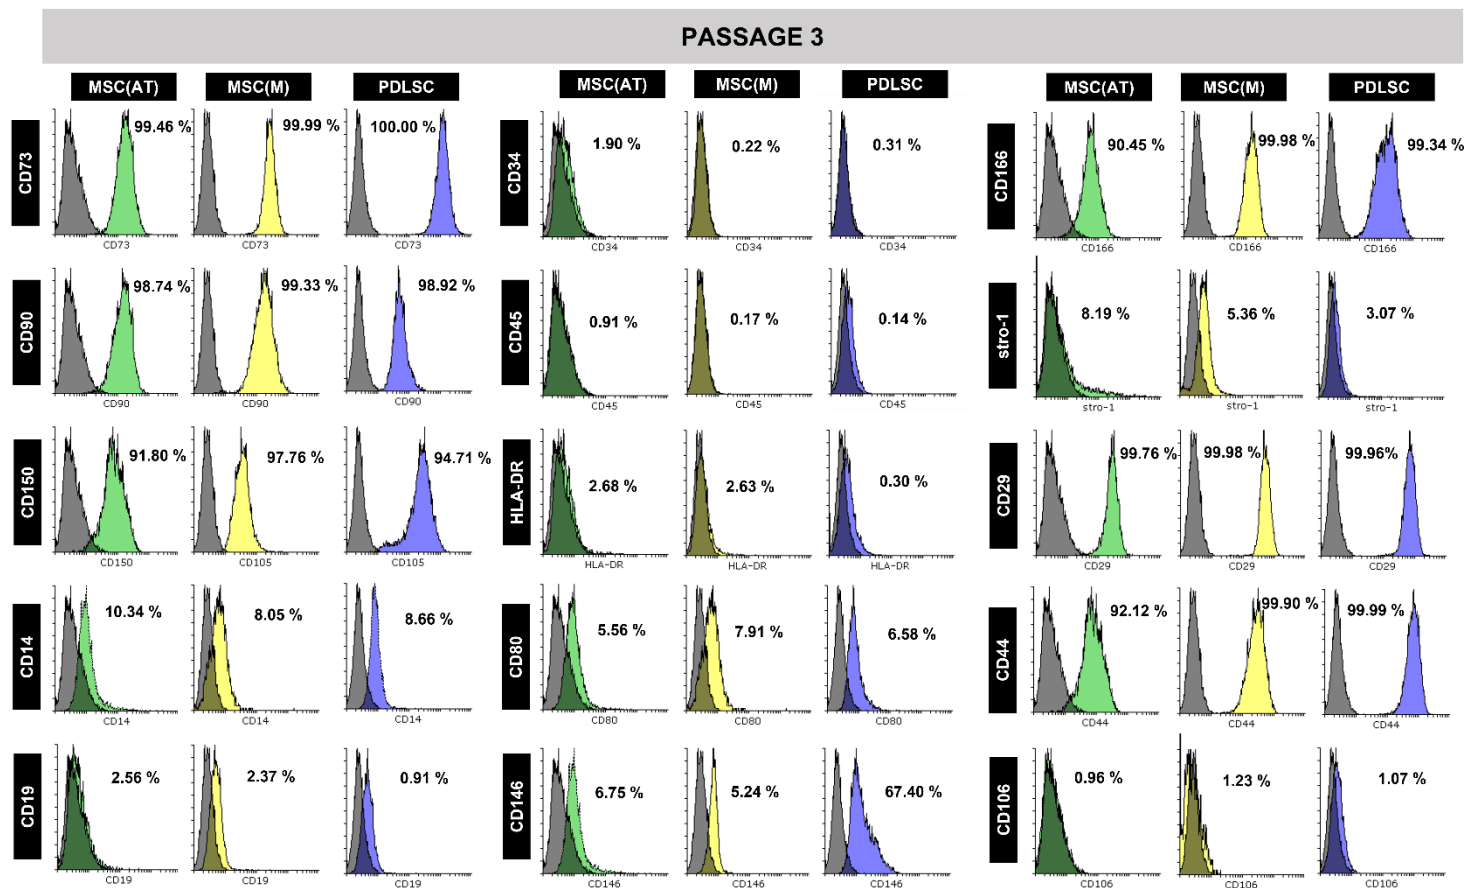

**Supplementary Figure S1.** Flow cytometry analysis of MSC(AT), MSC(M) and PDLSC at passage 3. Grey histograms are the controls for each cell source.

## Supplementary Figure S2

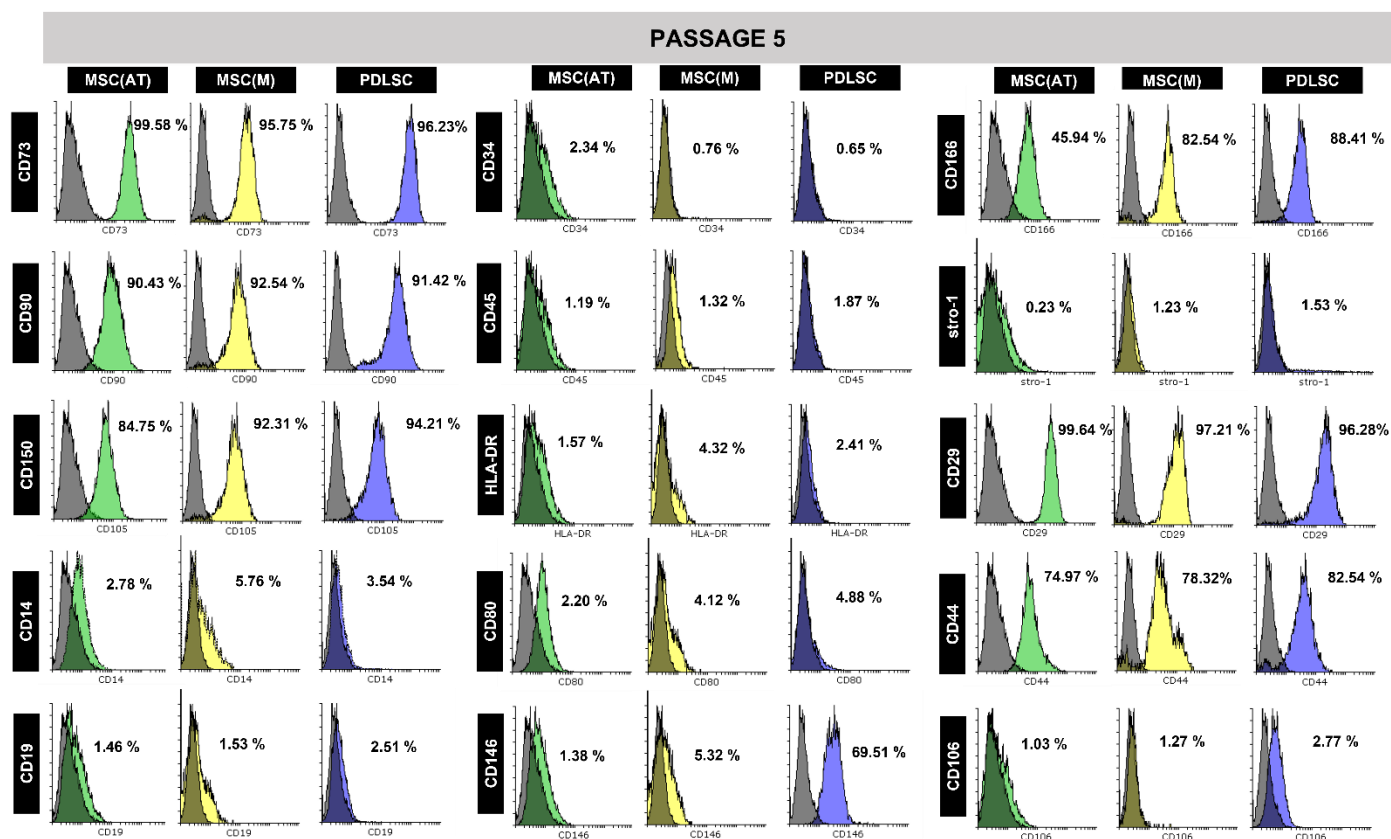

**Supplementary Figure S2.** Flow cytometry analysis of MSC(AT), MSC(M) and PDLSC at passage 5. Grey histograms are the controls for each cell source.

## Supplementary Figure S3

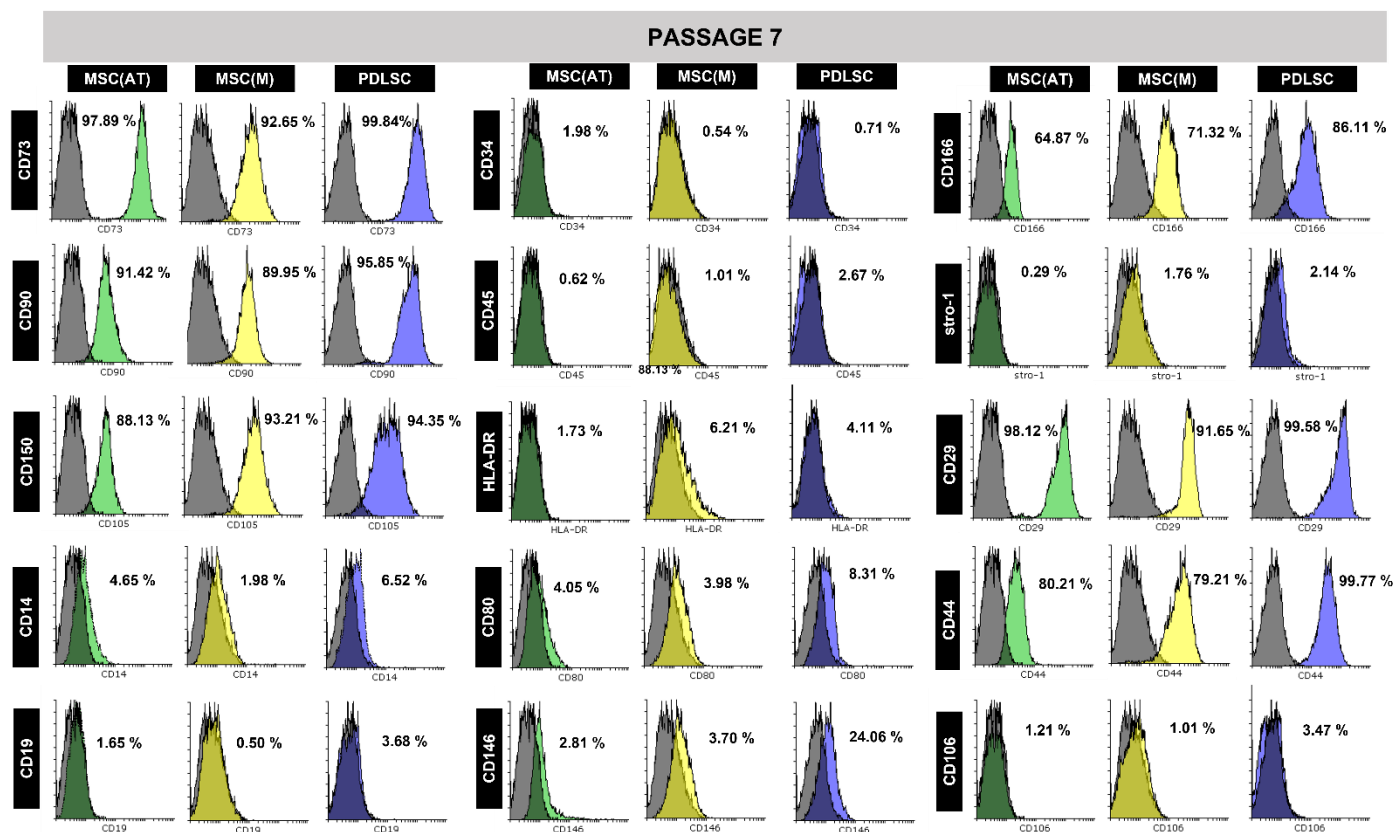

**Supplementary Figure S3.** Flow cytometry analysis of MSC(AT), MSC(M) and PDLSC at passage 7. Grey histograms are the controls for each cell source.

## Supplementary Table S1

**Supplementary Table S1.** Exponential regression parameters and respective coefficient of determination ( $R^2$ ) estimated using MS Excel for periodontal ligament stromal cells (PDLSC), bone marrow (MSC(M)) and adipose tissue-derived mesenchymal stromal cells (MSC(AT)) cultured for 9 days in expansion conditions and seeded at 1500 cells/cm<sup>2</sup> and 3000 cells/cm<sup>2</sup> in 12 well-plates (4 cm<sup>2</sup>).  $N_0$  corresponds to initial number of seeded cells and  $\mu$  is the cell growth rate.

|                                          | $N_0$ (cells) | $\mu$ (days <sup>-1</sup> ) | $R^2$ |
|------------------------------------------|---------------|-----------------------------|-------|
| <b>PDLSC 1500 cells/cm<sup>2</sup></b>   | 6000          | 0.531                       | 0.925 |
| <b>PDLSC 3000 cells/cm<sup>2</sup></b>   | 12000         | 0.496                       | 0.916 |
| <b>MSC(M) 1500 cells/cm<sup>2</sup></b>  | 6000          | 0.176                       | 0.900 |
| <b>MSC(M) 3000 cells/cm<sup>2</sup></b>  | 12000         | 0.165                       | 0.880 |
| <b>MSC(AT) 1500 cells/cm<sup>2</sup></b> | 6000          | 0.339                       | 0.913 |
| <b>MSC(AT) 3000 cells/cm<sup>2</sup></b> | 12000         | 0.220                       | 0.937 |
